# Supplementary material
Source: publisher figshare collection journal article supplement (https://tandf.figshare.com/ndownloader/files/31779062)
Supplement: Supplementary file 1 [file 31779062]

## **Supplementary tables to "A longitudinal study of morning, evening, and night light intensities and nocturnal sleep quality in a working population"**

### **Contents**

|                                                                                                                                                                                           |   |
|-------------------------------------------------------------------------------------------------------------------------------------------------------------------------------------------|---|
| Table S1: Sensitivity analyses excluding sleep episodes with < 50 % and < 75 % light measurement completeness                                                                             | 2 |
| Table S2: Sensitivity analysis with mean light intensities based on light recordings with lux <1 and <5 excluded                                                                          | 3 |
| Table S3: Disturbed sleep and awakening indices and mean sleep onset latency according to proportions of light recordings above thresholds of morning and evening white light intensities | 4 |
| Table S4: Disturbed sleep and awakening indices and mean sleep onset latency according to combined morning and day white light                                                            | 5 |

Table S1 Sensitivity analyses excluding sleep episodes with < 50 % and < 75 % light measurement completeness

| Threshold levels                                                                                                                                                      | Participants (n) | Sleep episodes (n) | Disturbed sleep index<br>Points (mean±SD) | Awakening index<br>Points (mean±SD) | Sleep onset latency<br>Minutes (mean±SD) |
|-----------------------------------------------------------------------------------------------------------------------------------------------------------------------|------------------|--------------------|-------------------------------------------|-------------------------------------|------------------------------------------|
| Morning white light, < 50 % excluded                                                                                                                                  |                  |                    |                                           |                                     |                                          |
| Adjusted coefficient per 1,000 lux <sup>abc</sup> (95%CI)                                                                                                             | 293              | 1,250              | -0.00 (-0.03;0.02)                        | 0.00 (-0.02;0.03)                   | 0.26 (-0.39;0.91)                        |
| Morning white light, < 75 % excluded                                                                                                                                  |                  |                    |                                           |                                     |                                          |
| Adjusted coefficient per 1,000 lux <sup>abc</sup> (95%CI)                                                                                                             | 300              | 1,412              | 0.00 (-0.02;0.02)                         | 0.01 (-0.02;0.03)                   | 0.21 (-0.38;0.79)                        |
| Evening white light, < 50 % excluded                                                                                                                                  |                  |                    |                                           |                                     |                                          |
| Adjusted coefficient per 100 lux <sup>abd</sup> (95%CI)                                                                                                               | 293              | 1,250              | 0.03 (-0.01;0.07)                         | 0.01 (-0.03;0.05)                   | 0.69 (-0.47;1.85)                        |
| Evening white light, < 75 % excluded                                                                                                                                  |                  |                    |                                           |                                     |                                          |
| Adjusted coefficient per 100 lux <sup>abd</sup> (95%CI)                                                                                                               | 300              | 1,412              | 0.02 (-0.01;0.05)                         | -0.00 (-0.04;0.03)                  | 0.42 (-0.61;1.45)                        |
| <sup>a</sup> Represents the change in mean disturbed sleep index, mean awakening index, and sleep onset latency due to a 1-unit increase in the given light parameter |                  |                    |                                           |                                     |                                          |
| <sup>b</sup> Adjusted for gender, age, BMI, smoking, hours since last sleep episode, chronotype, mean day light, and use of caffeinated drink before sleep.           |                  |                    |                                           |                                     |                                          |
| <sup>c</sup> Further adjusted for mean evening light                                                                                                                  |                  |                    |                                           |                                     |                                          |
| <sup>d</sup> Further adjusted for mean morning light                                                                                                                  |                  |                    |                                           |                                     |                                          |

Table S2 Sensitivity analysis with mean light intensities based on light recordings with lux <1 and <5 excluded

| Threshold levels                                                                                                                                                      | Participants (n) | Sleep episodes (n) | Disturbed sleep index<br>Points (mean±SD) | Awakening index<br>Points (mean±SD) | Sleep onset latency<br>Minutes (mean±SD) |
|-----------------------------------------------------------------------------------------------------------------------------------------------------------------------|------------------|--------------------|-------------------------------------------|-------------------------------------|------------------------------------------|
| Morning white light, < 1 lux excluded<br>Adjusted coefficient per 1,000 lux <sup>abc</sup> (95%CI)                                                                    | 300              | 1,482              | 0.00 (-0.02;0.02)                         | 0.00 (-0.02;0.02)                   | 0.22 (-0.35;0.79)                        |
| Morning white light, < 5 lux excluded<br>Adjusted coefficient per 1,000 lux <sup>abc</sup> (95%CI)                                                                    | 299              | 1,421              | -0.00 (-0.02;0.02)                        | 0.00 (-0.02;0.02)                   | 0.26 (-0.33;0.85)                        |
| Evening white light, < 1 lux excluded<br>Adjusted coefficient per 100 lux <sup>abd</sup> (95%CI)                                                                      | 300              | 1,482              | 0.02 (-0.02;0.05)                         | 0.00 (-0.03;0.04)                   | 0.24 (-0.70;1.19)                        |
| Evening white light, < 5 lux excluded<br>Adjusted coefficient per 100 lux <sup>abd</sup> (95%CI)                                                                      | 299              | 1,421              | 0.01 (-0.02;0.03)                         | 0.00 (-0.03;0.03)                   | 0.14 (-0.68;0.96)                        |
| <sup>a</sup> Represents the change in mean disturbed sleep index, mean awakening index, and sleep onset latency due to a 1-unit increase in the given light parameter |                  |                    |                                           |                                     |                                          |
| <sup>b</sup> Adjusted for gender, age, BMI, smoking, hours since last sleep episode, chronotype, mean day light, and use of caffeinated drink before sleep.           |                  |                    |                                           |                                     |                                          |
| <sup>c</sup> Further adjusted for mean evening light                                                                                                                  |                  |                    |                                           |                                     |                                          |
| <sup>d</sup> Further adjusted for mean morning light                                                                                                                  |                  |                    |                                           |                                     |                                          |

Table S3 Disturbed sleep and awakening indices and mean sleep onset latency according to proportions of light recordings above thresholds of morning and evening white light intensities

| Threshold levels                                         | Participants (n) | Sleep episodes (n) | Disturbed sleep index<br>Points (mean±SD) | Awakening index<br>Points (mean±SD) | Sleep onset latency<br>Minutes (mean±SD) |
|----------------------------------------------------------|------------------|--------------------|-------------------------------------------|-------------------------------------|------------------------------------------|
| Morning white light                                      |                  |                    |                                           |                                     |                                          |
| Adjusted coefficient <sup>abc</sup> (95%CI) (> 500 lux)  | 303              | 1,524              | -0.00 (-0.00;0.00)                        | 0.00 (-0.00;0.00)                   | -0.00 (-0.06;0.06)                       |
| Adjusted coefficient <sup>abc</sup> (95%CI) (> 1000 lux) | 303              | 1,524              | -0.00 (-0.00;0.00)                        | 0.00 (-0.00;0.00)                   | 0.01 (-0.07;0.09)                        |
| Adjusted coefficient <sup>abc</sup> (95%CI) (> 2500 lux) | 303              | 1,524              | -0.00 (-0.00;0.00)                        | 0.00 (-0.00;0.00)                   | -0.01 (-0.12;0.11)                       |
| Evening white light                                      |                  |                    |                                           |                                     |                                          |
| Adjusted coefficient <sup>abd</sup> (95%CI) (> 20 lux)   | 303              | 1,524              | -0.00 (-0.00;0.00)                        | -0.00 (-0.00;0.00)                  | 0.02 (-0.03;0.08)                        |
| Adjusted coefficient <sup>abd</sup> (95%CI) (> 40 lux)   | 303              | 1,524              | -0.00 (-0.00;0.00)                        | -0.00 (-0.00;0.00)                  | 0.02 (-0.06;0.09)                        |
| Adjusted coefficient <sup>abd</sup> (95%CI) (> 80 lux)   | 303              | 1,524              | -0.00 (-0.00;0.00)                        | -0.00 (-0.01;0.00)                  | 0.01 (-0.10;0.12)                        |

<sup>a</sup>Represents the change in mean disturbed sleep index, mean awakening index, and sleep onset latency due to a 1 percent increase in proportions of light recordings above given thresholds

<sup>b</sup>Adjusted for gender, age, BMI, smoking, hours since last sleep episode, chronotype, mean day light, and use of caffeinated drink before sleep.

<sup>c</sup>Further adjusted for mean evening light

<sup>d</sup>Further adjusted for mean morning light

Table S4 Disturbed sleep and awakening indices and mean sleep onset latency according to combined morning and day white light

| Light intensity by time of the day <sup>a</sup>          | Participants (n) | Sleep episodes (n) | Disturbed sleep index<br>Points (mean±SD) | Awakening index<br>Points (mean±SD) | Sleep onset latency<br>Minutes (mean±SD) |
|----------------------------------------------------------|------------------|--------------------|-------------------------------------------|-------------------------------------|------------------------------------------|
| Morning and day white light combined                     |                  |                    |                                           |                                     |                                          |
| 0-394 lux                                                | 202              | 524                | 1.9±0.8                                   | 2.7±0.9                             | 14.7±18.5                                |
| 395-1,538 lux                                            | 245              | 525                | 1.9±0.8                                   | 2.7±0.9                             | 13.5±21.0                                |
| 1,539-19,986 lux                                         | 201              | 525                | 1.9±0.8                                   | 2.5±0.9                             | 14.9±25.6                                |
| Adjusted coefficient per 1,000 lux <sup>bc</sup> (95%CI) | 303              | 1,524              | -0.01 (-0.03;0.03)                        | -0.02 (-0.03;0.03)                  | 0.05 (-0.44;0.55)                        |

<sup>a</sup>Light intensity groups defined by tertiles

<sup>b</sup>Represents the change in mean disturbed sleep index, mean awakening index, mean day light, and sleep onset latency due to a 1-unit increase in the given light parameter

<sup>c</sup>Adjusted for gender, age, BMI, smoking, hours since last sleep episode, chronotype, evening light, and use of caffeinated drink before sleep
